# Supplementary material for: Investigation of the Key Genes Associated with Anthocyanin Accumulation during Inner Leaf Reddening in Ornamental Kale (Brassica oleracea L. var. acephala)
Source: MDPI journal article supplement (doi:10.3390/ijms24032837), 2023-02-02
Supplement: s1 [file s1]

**Table S1.** Summary of transcriptome sequencing data.

| Sample | Raw Data<br>Read | Raw Data<br>Base | Valid Data<br>Read | Valid Data<br>Base | Valid Ratio<br>(reads) | Q20%  | Q30%  | GC content% |
|--------|------------------|------------------|--------------------|--------------------|------------------------|-------|-------|-------------|
| S0_1   | 45,944,336       | 6.89G            | 45,381,766         | 6.81G              | 98.78                  | 99.68 | 96.89 | 46.5        |
| S0_2   | 46,147,772       | 6.92G            | 45,672,436         | 6.85G              | 98.97                  | 99.63 | 96.79 | 46.5        |
| S0_3   | 56,896,248       | 8.53G            | 56,095,986         | 8.41G              | 98.59                  | 99.5  | 95.34 | 46.5        |
| S1_1   | 46,366,224       | 6.95G            | 44,788,004         | 6.72G              | 96.6                   | 99.36 | 95.82 | 46.5        |
| S1_2   | 46,445,136       | 6.97G            | 45,910,946         | 6.89G              | 98.85                  | 99.52 | 96.45 | 47          |
| S1_3   | 52,275,366       | 7.84G            | 49,349,172         | 7.40G              | 94.4                   | 99.38 | 96.07 | 46.5        |
| S2_1   | 49,100,766       | 7.37G            | 48,519,316         | 7.28G              | 98.82                  | 99.54 | 96.43 | 46.5        |
| S2_2   | 41,965,700       | 6.29G            | 41,491,120         | 6.22G              | 98.87                  | 99.48 | 96.44 | 47          |
| S2_3   | 48,852,286       | 7.33G            | 48,337,902         | 7.25G              | 98.95                  | 99.73 | 95.36 | 47          |

**Table S2.** Statistics date of the alignment between valid reads and reference genome.

| Sample | Valid reads | Mapped reads     | Unique Mapped reads | Multi Mapped reads | PE Mapped reads  | Reads map to sense strand | Reads map to antisense strand | Non-splice reads | Splice reads     |
|--------|-------------|------------------|---------------------|--------------------|------------------|---------------------------|-------------------------------|------------------|------------------|
| S0_1   | 45381766    | 40305253(88.81%) | 29492498(64.99%)    | 10812755(23.83%)   | 36481492(80.39%) | 19368150(42.68%)          | 19415396(42.78%)              | 22195630(48.91%) | 16587916(36.55%) |
| S0_2   | 45672436    | 40507092(88.69%) | 29725357(65.08%)    | 10781735(23.61%)   | 36351772(79.59%) | 19439062(42.56%)          | 19506384(42.71%)              | 21722037(47.56%) | 17223409(37.71%) |
| S0_3   | 56095986    | 49495423(88.23%) | 35691317(63.63%)    | 13804106(24.61%)   | 44167792(78.74%) | 23744425(42.33%)          | 23816119(42.46%)              | 27167921(48.43%) | 20392623(36.35%) |
| S1_1   | 44788004    | 39018973(87.12%) | 28689454(64.06%)    | 10329519(23.06%)   | 33163544(74.05%) | 18732057(41.82%)          | 18778870(41.93%)              | 20953209(46.78%) | 16557718(36.97%) |
| S1_2   | 45910946    | 40504701(88.22%) | 28875734(62.90%)    | 11628967(25.33%)   | 36193334(78.83%) | 19192335(41.80%)          | 19254088(41.94%)              | 21822790(47.53%) | 16623633(36.21%) |
| S1_3   | 49349172    | 42871978(86.87%) | 31706010(64.25%)    | 11165968(22.63%)   | 35499908(71.94%) | 20556663(41.66%)          | 20617923(41.78%)              | 23911105(48.45%) | 17263481(34.98%) |
| S2_1   | 48519316    | 42940895(88.50%) | 31197250(64.30%)    | 11743645(24.20%)   | 38401442(79.15%) | 20546864(42.35%)          | 20603463(42.46%)              | 23729446(48.91%) | 17420881(35.91%) |

---

|      |          |                  |                  |                  |                  |                  |                  |                  |                  |
|------|----------|------------------|------------------|------------------|------------------|------------------|------------------|------------------|------------------|
| S2_2 | 41491120 | 36582367(88.17%) | 26359475(63.53%) | 10222892(24.64%) | 32455674(78.22%) | 17435004(42.02%) | 17477657(42.12%) | 20059626(48.35%) | 14853035(35.80%) |
| S2_3 | 48337902 | 42983832(88.92%) | 27778574(57.47%) | 15205258(31.46%) | 39138142(80.97%) | 19485352(40.31%) | 19566866(40.48%) | 24203847(50.07%) | 14848371(30.72%) |

---

**Table S3.** Reference genes and primers used for quantitative real-time PCR analysis.

| Locus                              | Primer sequence (5'-3')                                   |
|------------------------------------|-----------------------------------------------------------|
| <i>4CL3</i> ( <i>Bo6g099190</i> )  | F: GAGATGAAGTGGCTGGAGAAG<br>R: TGGGAATGGAGGGAACAAAG       |
| <i>C4H</i> ( <i>Bo5g052100</i> )   | F: GTATGTGCCGTTTGGTGTG<br>R: GTATCCACTTTAGACTGTCCCG       |
| <i>CHI</i> ( <i>Bo9g177250</i> )   | F: ATCACTTACCGTTTCTCAGCC<br>R: TCCCTACCACATTCGCATT        |
| <i>DFR</i> ( <i>Bo2g116380</i> )   | F: TCGGGATTTCATCGGTTTCATG<br>R: TTCGTCAGATAAATCGGTGGG     |
| <i>DFR</i> ( <i>Bo9g058630</i> )   | F: AGCCGATTTATCTGACGAAGG<br>R: TTATCCCCAACACTCCATTAC      |
| <i>DXS</i> ( <i>Bo7g103850</i> )   | F: CGCATGTGGTTCAGTTTCTTG<br>R: GCTATATGAGACGGCATAAGTCC    |
| <i>F3'H</i> ( <i>Bo9g174880</i> )  | F: GCCCGCACTTGATTGTTTAG<br>R: CATGTCCGTGTGCTTTTGATC       |
| <i>F3H</i> ( <i>Bo8g081770</i> )   | F: ACCGTGTATCCGCTTAAAGTG<br>R: TCCTTGTGGTCATGCTCTTC       |
| <i>TT19</i> ( <i>Bo9g161480</i> )  | F: GCTGATGTTGAGGTGGGTTAC<br>R: TTGTCGTATATGTCCAAGACCAC    |
| <i>Actin</i> ( <i>Bo1g116200</i> ) | F: GGTCGTGACCTTACTGATTACCTCA<br>R: GAAGTCTCCATCTCCTGCTCGT |

**Table S4.** Positive related DEGs in the gene co-expression analysis.

| Data1      | Data2       | rho       | p-value     | Data1      | Data2                 | rho       | p-value     |
|------------|-------------|-----------|-------------|------------|-----------------------|-----------|-------------|
| Bo8g081770 | Bo9g177250  | 0.9924252 | 1.23631E-07 | 4CL3       | MSTRG.20312           | 0.8709524 | 0.002235517 |
| Bo3g023240 | Bo8g081770  | 0.986839  | 8.50121E-07 | 4CL3       | Bo9g017560            | 0.8694323 | 0.002325439 |
| Bo8g081770 | MSTRG.22323 | 0.9797221 | 3.83286E-06 | 4CL3       | Bo3g065330            | 0.8677186 | 0.002429778 |
| Bo3g023240 | Bo9g177250  | 0.978684  | 4.56008E-06 | 4CL3       | ATDFD                 | 0.8671983 | 0.002462081 |
| 4CL3       | MSTRG.11229 | 0.9765148 | 6.3879E-06  | Bo5g030290 | Bo8g081770            | 0.8638904 | 0.002674444 |
| Bo2g055220 | Bo9g177250  | 0.9758722 | 7.01644E-06 | 4CL3       | Bo2g057490;Bo2g057500 | 0.8632824 | 0.002714802 |
| APX4       | Bo9g177250  | 0.9684753 | 1.77594E-05 | Bo6g121430 | Bo8g081770            | 0.8599344 | 0.002944597 |
| APX4       | Bo8g081770  | 0.9676253 | 1.94764E-05 | Bo8g077260 | Bo8g081770            | 0.8595603 | 0.00297108  |
| 4CL3       | Bo8g081770  | 0.9664892 | 2.19507E-05 | Bo9g177250 | GLU1                  | 0.8593887 | 0.002983284 |
| Bo2g055220 | Bo8g081770  | 0.9644416 | 2.69604E-05 | Bo8g081770 | SBPASE                | 0.8585852 | 0.003040871 |
| 4CL3       | MSTRG.22323 | 0.9642225 | 2.75403E-05 | Bo5g030290 | Bo9g177250            | 0.8579847 | 0.003084407 |
| Bo9g177250 | MSTRG.22323 | 0.9617281 | 3.47814E-05 | Bo8g081770 | Bo9g017560            | 0.8570926 | 0.003149882 |
| Bo5g049100 | Bo8g081770  | 0.9613751 | 3.59048E-05 | Bo7g106470 | Bo9g177250            | 0.856419  | 0.003199944 |
| 4CL3       | Bo3g091610  | 0.9613033 | 3.61362E-05 | Bo1g133310 | Bo9g177250            | 0.8508362 | 0.003636118 |

|                           |             |           |             |                       |                       |           |             |
|---------------------------|-------------|-----------|-------------|-----------------------|-----------------------|-----------|-------------|
| 4CL3                      | Bo3g135880  | 0.9590898 | 4.38072E-05 | Bo1g002260            | Bo8g081770            | 0.8475102 | 0.003914478 |
| 4CL3                      | Bo7g003670  | 0.9574443 | 0.000050209 | 4CL3                  | Bo1g133310            | 0.8455009 | 0.004089545 |
| Bo5g049100                | Bo9g177250  | 0.949493  | 9.07293E-05 | Bo8g081770            | NDF4                  | 0.8439774 | 0.004225808 |
| 4CL3                      | Bo9g177250  | 0.9486776 | 9.58828E-05 | Bo8g081770            | Bo9g014470            | 0.8394624 | 0.004647845 |
| Bo8g081770                | CES101      | 0.9482874 | 9.84204E-05 | Bo9g177250            | SBPASE                | 0.8364782 | 0.004942085 |
| 4CL3                      | Bo3g023240  | 0.9479657 | 0.000100548 | 4CL3                  | Bo8g077260            | 0.8360073 | 0.004989655 |
| Bo9g177250                | CES101      | 0.9475742 | 0.000103181 | Bo6g121430            | Bo9g177250            | 0.8325175 | 0.005351946 |
| Bo3g091610                | Bo8g081770  | 0.947267  | 0.000105281 | Bo8g081770            | Bo8g082800            | 0.8317757 | 0.005431196 |
| Bo1g019620                | Bo8g081770  | 0.9463161 | 0.00011197  | Bo3g149690            | Bo8g081770            | 0.8313386 | 0.005478279 |
| 4CL3                      | Bo9g018200  | 0.9439929 | 0.000129568 | 4CL3                  | Bo5g130300            | 0.8254321 | 0.006141975 |
| Bo3g065330                | Bo8g081770  | 0.9417442 | 0.000148377 | Bo8g077260            | Bo9g177250            | 0.8248445 | 0.006210856 |
| Bo8g081770                | MSTRG.36038 | 0.9415423 | 0.000150155 | 4CL3                  | Bo5g009730            | 0.8234114 | 0.006381053 |
| Bo8g081770                | MSTRG.11229 | 0.9410402 | 0.00015464  | Bo2g009460            | Bo8g081770            | 0.822205  | 0.006526753 |
| Bo8g081770                | Bo9g018200  | 0.9396596 | 0.000167459 | 4CL3                  | Bo6g121430            | 0.8219448 | 0.006558474 |
| Bo2g057490;<br>Bo2g057500 | Bo9g177250  | 0.9394099 | 0.000169855 | 4CL3                  | Bo8g020530            | 0.8213475 | 0.006631689 |
| Bo2g057490;<br>Bo2g057500 | Bo8g081770  | 0.9373892 | 0.00019014  | Bo1g002260            | Bo9g177250            | 0.8201953 | 0.006774487 |
| Bo3g065330                | Bo9g177250  | 0.9368326 | 0.000196014 | Bo9g177250            | NDF4                  | 0.8195352 | 0.006857235 |
| Bo3g091610                | Bo9g177250  | 0.9339541 | 0.000228442 | Bo8g081770            | PEX11D                | 0.8157112 | 0.007350128 |
| 4CL3                      | Bo8g082800  | 0.9336946 | 0.000231539 | Bo9g014470            | Bo9g177250            | 0.8150543 | 0.00743714  |
| Bo9g177250                | MSTRG.36038 | 0.9310924 | 0.000264249 | Bo3g149690            | Bo9g177250            | 0.8146619 | 0.007489466 |
| 4CL3                      | Bo2g055220  | 0.9297283 | 0.00028263  | 4CL3                  | Bo7g106470            | 0.8145518 | 0.007504186 |
| Bo1g019620                | Bo9g177250  | 0.9276384 | 0.000312507 | Bo9g017560            | Bo9g177250            | 0.8128625 | 0.007732563 |
| Bo9g018200                | Bo9g177250  | 0.9268474 | 0.000324371 | 4CL3                  | GLU1                  | 0.8123753 | 0.007799288 |
| 4CL3                      | APX4        | 0.9268353 | 0.000324555 | Bo8g082800            | Bo9g177250            | 0.8111671 | 0.007966459 |
| 4CL3                      | Bo5g049100  | 0.9258078 | 0.00034044  | Bo8g081770            | Bo9g166510;Bo9g166500 | 0.8107616 | 0.008023092 |
| Bo3g135880                | Bo8g081770  | 0.925661  | 0.000342754 | Bo3g066140;Bo3g066150 | Bo8g081770            | 0.8010853 | 0.009457034 |

|            |             |           |             |                       |            |           |             |
|------------|-------------|-----------|-------------|-----------------------|------------|-----------|-------------|
| 4CL3       | Bo1g019620  | 0.9232013 | 0.000383173 | 4CL3                  | Bo1g002260 | 0.8004936 | 0.009549945 |
| Bo9g177250 | MSTRG.11229 | 0.917658  | 0.00048632  | Bo5g073010            | Bo8g081770 | 0.7981188 | 0.009929051 |
| Bo2g064700 | Bo8g081770  | 0.9172802 | 0.000493987 | Bo9g166510;Bo9g166500 | Bo9g177250 | 0.7964083 | 0.01020832  |
| Bo8g081770 | MSTRG.20312 | 0.9135413 | 0.000574493 | 4CL3                  | SBPASE     | 0.7950936 | 0.01042652  |
| ATDFD      | Bo8g081770  | 0.9121911 | 0.000605692 | Bo2g009460            | Bo9g177250 | 0.7932613 | 0.01073586  |
| Bo3g135880 | Bo9g177250  | 0.9111206 | 0.000631252 | Bo9g177250            | PEX11D     | 0.7931957 | 0.01074705  |
| 4CL3       | CES101      | 0.9101688 | 0.000654605 | 4CL3                  | Bo9g014470 | 0.7861386 | 0.01199702  |
| Bo7g003670 | Bo8g081770  | 0.9076008 | 0.000720615 | Bo3g066140;Bo3g066150 | Bo9g177250 | 0.7779657 | 0.0135625   |
| Bo9g177250 | MSTRG.20312 | 0.9040504 | 0.00081934  | 4CL3                  | NDF4       | 0.7752907 | 0.01410315  |
| 4CL3       | Bo2g064700  | 0.8963922 | 0.001063735 | 4CL3                  | Bo3g036060 | 0.7708756 | 0.01502674  |
| Bo3g036060 | Bo9g177250  | 0.8956779 | 0.001088838 | Bo2g095130            | Bo8g081770 | 0.7697906 | 0.01525974  |
| Bo2g064700 | Bo9g177250  | 0.8923614 | 0.001210819 | Bo5g073010            | Bo9g177250 | 0.7690496 | 0.01542023  |
| Bo7g003670 | Bo9g177250  | 0.8912478 | 0.001253818 | Bo8g081440            | Bo8g081770 | 0.7656587 | 0.01616909  |
| Bo8g020530 | Bo9g177250  | 0.8907101 | 0.001274958 | 4CL3                  | Bo2g009460 | 0.7656181 | 0.01617821  |

|            |             |           |             |            |                       |           |            |
|------------|-------------|-----------|-------------|------------|-----------------------|-----------|------------|
| 4CL3       | Bo2g064700  | 0.8963922 | 0.001063735 | 4CL3       | Bo5g030290            | 0.7611993 | 0.01719031 |
| Bo3g036060 | Bo9g177250  | 0.8956779 | 0.001088838 | Bo8g081440 | Bo9g177250            | 0.7507767 | 0.01974248 |
| Bo2g064700 | Bo9g177250  | 0.8923614 | 0.001210819 | 4CL3       | Bo3g149690            | 0.7490047 | 0.02019993 |
| Bo7g003670 | Bo9g177250  | 0.8912478 | 0.001253818 | Bo2g095130 | Bo9g177250            | 0.7459851 | 0.02099552 |
| Bo8g020530 | Bo9g177250  | 0.8907101 | 0.001274958 | Bo4g188460 | Bo8g081770            | 0.7418439 | 0.02211999 |
| Bo5g009730 | Bo8g081770  | 0.8898346 | 0.001309903 | Bo3g064000 | Bo8g081770            | 0.7356111 | 0.02388623 |
| Bo3g036060 | Bo8g081770  | 0.8894413 | 0.001325815 | 4CL3       | PEX11D                | 0.7330366 | 0.02464207 |
| Bo5g130300 | Bo8g081770  | 0.8892099 | 0.001335241 | 4CL3       | Bo5g073010            | 0.7294424 | 0.02572336 |
| ATDFD      | Bo9g177250  | 0.8883099 | 0.001372342 | Bo4g188460 | Bo9g177250            | 0.7253444 | 0.02699371 |
| 4CL3       | MSTRG.36038 | 0.8875015 | 0.001406268 | 4CL3       | Bo3g066140;Bo3g066150 | 0.7240729 | 0.02739607 |
| Bo5g009730 | Bo9g177250  | 0.8801997 | 0.001739569 | 4CL3       | Bo9g166510;Bo9g166500 | 0.7216064 | 0.02818778 |
| Bo1g133310 | Bo8g081770  | 0.8795525 | 0.001771517 | Bo3g064000 | Bo9g177250            | 0.7063654 | 0.03341318 |
| Bo7g106470 | Bo8g081770  | 0.8794198 | 0.001778117 | Bo5g146590 | Bo9g177250            | 0.6753736 | 0.04589265 |
| Bo8g081770 | GLU1        | 0.8791832 | 0.001789927 | Bo5g146590 | Bo8g081770            | 0.6733114 | 0.04681498 |
| 4CL3       | Bo3g064000  | 0.8780305 | 0.001848248 | 4CL3       | Bo2g095130            | 0.6673356 | 0.04955435 |



|            |            |           |             |
|------------|------------|-----------|-------------|
| Bo5g130300 | Bo9g177250 | 0.8744428 | 0.002038179 |
|------------|------------|-----------|-------------|

**Table S5.** Negative related DEGs in the gene co-expression analysis.

| <b>Data1</b> | <b>Data2</b> | <b>rho</b> | <b>p-value</b> | <b>Data1</b> | <b>Data2</b> | <b>rho</b> | <b>p-value</b> |
|--------------|--------------|------------|----------------|--------------|--------------|------------|----------------|
| Bo9g177250   | MSTRG.15380  | -0.9677876 | 1.91397E-05    | Bo5g009840   | Bo8g081770   | -0.8413437 | 0.004468643    |
| Bo8g081770   | MSTRG.15380  | -0.9499618 | 8.78566E-05    | 4CL3         | Bo3g037630   | -0.8401011 | 0.004586467    |
| Bo9g177250   | MSTRG.36902  | -0.9290215 | 0.000292499    | 4CL3         | SKS1         | -0.8374456 | 0.004845347    |
| Bo3g037630   | Bo9g177250   | -0.9283764 | 0.000301716    | Bo6g032890   | Bo9g177250   | -0.8364381 | 0.00494612     |
| Bo6g093040   | Bo9g177250   | -0.9280117 | 0.000307015    | 4CL3         | Bo9g153840   | -0.833808  | 0.005215945    |
| Bo9g177250   | MSTRG.5945   | -0.9278001 | 0.00031012     | 4CL3         | Bo3g163990   | -0.8326499 | 0.005337883    |
| Bo6g093040   | Bo8g081770   | -0.9256051 | 0.000343637    | 4CL3         | RIP2         | -0.8301929 | 0.005602992    |
| Bo9g172240   | Bo9g177250   | -0.916164  | 0.000517136    | Bo3g004170   | Bo8g081770   | -0.829579  | 0.005670599    |
| Bo9g177250   | IQD16        | -0.9156711 | 0.000527595    | Bo3g184380   | Bo9g177250   | -0.8287612 | 0.005761534    |
| Bo4g195410   | Bo9g177250   | -0.9154704 | 0.000531896    | Bo7g118740   | Bo8g081770   | -0.8275286 | 0.005900463    |
| Bo9g177250   | ENODL14      | -0.9148758 | 0.00054478     | 4CL3         | Bo4g195410   | -0.82746   | 0.005908262    |
| Bo9g177250   | RIP2         | -0.912969  | 0.000587577    | 4CL3         | Bo2g006660   | -0.8268015 | 0.005983478    |

|            |             |            |             |            |             |            |             |
|------------|-------------|------------|-------------|------------|-------------|------------|-------------|
| Bo9g177250 | MSTRG.6090  | -0.9121967 | 0.00060556  | Bo3g017510 | Bo8g081770  | -0.8252343 | 0.0061651   |
| Bo2g006660 | Bo9g177250  | -0.9111199 | 0.00063127  | 4CL3       | Bo3g021660  | -0.8231152 | 0.006416612 |
| Bo9g177250 | SKS1        | -0.9096383 | 0.00066788  | 4CL3       | IQD16       | -0.823024  | 0.006427598 |
| Bo8g081770 | ENODL14     | -0.9089557 | 0.000685235 | Bo8g081770 | DIN11       | -0.8206153 | 0.006722194 |
| Bo3g163990 | Bo9g177250  | -0.9035493 | 0.000833992 | Bo1g134740 | Bo9g177250  | -0.8191428 | 0.006906741 |
| Bo8g081770 | MSTRG.5945  | -0.9013876 | 0.000899309 | Bo8g081770 | Bo9g181830  | -0.8190802 | 0.006914659 |
| Bo9g153840 | Bo9g177250  | -0.90053   | 0.000926178 | 4CL3       | Bo1g039320  | -0.8182688 | 0.007017891 |
| Bo3g037630 | Bo8g081770  | -0.9003663 | 0.000931369 | 4CL3       | MSTRG.36902 | -0.8177318 | 0.007086787 |
| Bo8g081770 | MSTRG.6090  | -0.8981653 | 0.001003163 | 4CL3       | MSTRG.36727 | -0.8141696 | 0.007555442 |
| 4CL3       | Bo6g093040  | -0.8939807 | 0.001150137 | 4CL3       | Bo6g072960  | -0.8129589 | 0.007719405 |
| Bo9g177250 | MSTRG.36727 | -0.8937296 | 0.001159403 | 4CL3       | Bo6g106910  | -0.8085805 | 0.008332458 |
| Bo9g177250 | MSTRG.29785 | -0.8934539 | 0.00116964  | Bo7g093130 | Bo8g081770  | -0.8053634 | 0.008803364 |
| Bo8g081770 | MSTRG.36902 | -0.8921127 | 0.001220331 | 4CL3       | Bo2g006810  | -0.8045486 | 0.00892543  |
| Bo1g039320 | Bo9g177250  | -0.8918406 | 0.0012308   | Bo8g081770 | PFK3        | -0.8042555 | 0.008969613 |
| Bo6g072960 | Bo9g177250  | -0.89163   | 0.001238942 | Bo8g081770 | Bo9g169650  | -0.8037834 | 0.009041099 |
| Bo3g021660 | Bo9g177250  | -0.8910883 | 0.001260065 | Bo3g153060 | Bo9g177250  | -0.8031517 | 0.009137351 |
| Bo2g006810 | Bo9g177250  | -0.8904404 | 0.001285653 | 4CL3       | MSTRG.29785 | -0.8004946 | 0.009549796 |
| Bo8g081770 | Bo9g172240  | -0.8902813 | 0.001291991 | Bo6g120830 | Bo8g081770  | -0.8004904 | 0.009550453 |
| 4CL3       | MSTRG.15380 | -0.8896182 | 0.001318642 | Bo6g117860 | Bo9g177250  | -0.8003333 | 0.009575228 |
| Bo8g081770 | IQD16       | -0.888291  | 0.001373126 | 4CL3       | Bo3g004170  | -0.7982357 | 0.009910151 |
| Bo5g009840 | Bo9g177250  | -0.8876709 | 0.001399112 | Bo5g131870 | Bo9g177250  | -0.7958877 | 0.01029435  |
| Bo6g106910 | Bo9g177250  | -0.881647  | 0.00166957  | Bo3g184380 | Bo8g081770  | -0.7944338 | 0.01053721  |
| Bo4g195410 | Bo8g081770  | -0.8796555 | 0.001766405 | Bo3g034260 | Bo9g177250  | -0.7914662 | 0.01104485  |
| Bo8g081770 | RIP2        | -0.8763767 | 0.001934204 | 4CL3       | Bo7g118740  | -0.7893449 | 0.01141765  |
| Bo2g006660 | Bo8g081770  | -0.8746323 | 0.002027824 | Bo6g032890 | Bo8g081770  | -0.789135  | 0.01145498  |
| Bo8g081770 | SKS1        | -0.8737642 | 0.002075562 | 4CL3       | Bo5g009840  | -0.7885209 | 0.01156471  |
| Bo3g017510 | Bo9g177250  | -0.87131   | 0.002214716 | 4CL3       | Bo3g017510  | -0.788395  | 0.01158728  |
| Bo7g118740 | Bo9g177250  | -0.8711408 | 0.002224541 | 4CL3       | Bo9g181830  | -0.7802225 | 0.01311732  |
| Bo3g163990 | Bo8g081770  | -0.8686646 | 0.00237179  | 4CL3       | PFK3        | -0.7776816 | 0.01361925  |
| Bo8g081770 | Bo9g153840  | -0.8669514 | 0.002477518 | Bo6g117860 | Bo8g081770  | -0.7762385 | 0.01390997  |

---

|            |             |            |             |            |            |            |            |
|------------|-------------|------------|-------------|------------|------------|------------|------------|
| Bo3g004170 | Bo9g177250  | -0.8665979 | 0.002499732 | 4CL3       | DIN11      | -0.7760634 | 0.01394554 |
| Bo9g177250 | DIN11       | -0.863608  | 0.002693136 | 4CL3       | Bo6g120830 | -0.769442  | 0.01533511 |
| Bo8g081770 | MSTRG.29785 | -0.8562137 | 0.003215307 | 4CL3       | Bo9g169650 | -0.7675178 | 0.0157556  |
| Bo6g106910 | Bo8g081770  | -0.854325  | 0.003359062 | Bo1g134740 | Bo8g081770 | -0.7628252 | 0.01681315 |
| Bo1g039320 | Bo8g081770  | -0.8543202 | 0.003359436 | Bo1g016660 | Bo9g177250 | -0.761213  | 0.01718711 |
| Bo8g081770 | MSTRG.36727 | -0.8542348 | 0.003366032 | 4CL3       | Bo7g093130 | -0.7608027 | 0.01728316 |
| Bo7g093130 | Bo9g177250  | -0.852708  | 0.003485597 | Bo3g153060 | Bo8g081770 | -0.7496205 | 0.02004016 |
| Bo6g072960 | Bo8g081770  | -0.8521604 | 0.003529176 | 4CL3       | Bo6g032890 | -0.7437223 | 0.02160513 |
| Bo3g021660 | Bo8g081770  | -0.852152  | 0.003529855 | 4CL3       | Bo3g184380 | -0.7415393 | 0.02220422 |
| Bo2g006810 | Bo8g081770  | -0.8502741 | 0.003682172 | Bo5g131870 | Bo8g081770 | -0.7367441 | 0.02355849 |
| Bo9g177250 | Bo9g181830  | -0.8495976 | 0.003738133 | 4CL3       | Bo1g134740 | -0.7359974 | 0.02377412 |
| 4CL3       | MSTRG.6090  | -0.8488836 | 0.003797827 | Bo3g034260 | Bo8g081770 | -0.7344615 | 0.02422181 |
| Bo9g169650 | Bo9g177250  | -0.8480801 | 0.003865781 | 4CL3       | Bo3g153060 | -0.7231776 | 0.02768175 |
| Bo6g120830 | Bo9g177250  | -0.8478605 | 0.003884496 | 4CL3       | Bo5g131870 | -0.7026272 | 0.03478437 |
| 4CL3       | MSTRG.5945  | -0.8449058 | 0.004142404 | 4CL3       | Bo6g117860 | -0.7016765 | 0.03513883 |
| 4CL3       | ENODL14     | -0.8446165 | 0.004168272 | Bo1g016660 | Bo8g081770 | -0.7006586 | 0.03552092 |
| Bo9g177250 | PFK3        | -0.8441267 | 0.004212315 | 4CL3       | Bo3g034260 | -0.690992  | 0.03928443 |
| 4CL3       | Bo9g172240  | -0.841599  | 0.004444698 | 4CL3       | Bo1g016660 | -0.6870951 | 0.04087155 |

---
